# Supplementary material for: Human Fear Chemosignaling: Evidence from a Meta-Analysis
Source: Oxford University Press journal article supplement (doi:10.1093/chemse/bjx049), 2017-08-07
Supplement: bjx049_suppl_S1_Pcurve_Disclosure_Table_JdG_MS.xlsx [file bjx049_suppl_S1_Pcurve_Disclosure_Table_JdG_MS.xlsx]

## Sheet: Disclosure Table
This is the full p-curve disclosure table for the meta-analysis of De Groot & Smeets Rationale: The p-values subjected to p-curve analysis need to be statistically independent. Because some studies based evidence for a stated hypothesis (e.g., cautious behavior) on co-dependent measures (e.g., decreased reaction time, increased accuracy), we conducted additional p-curves, called robustness checks…
Original Paper (+ experiment)	(1) Quoted text from original paper indicating prediction of interest to researchers	(2) Study design	(3) Key statistical result	(4) Quoted text from original paper with statistical results	(5) Results	(6) Robustness results (second of primary)	(7) Robustness results (median of) secondary outcome(s)
Lübke et al. (2017)	In other words, the auditory startle response of prepubertal girls should be augmented when primed by anxiety chemosignals, similar to what has been shown with adults.	within-subjects design, 3 (odor: anxiety sweat vs. sport sweat vs. cotton pad)	Simple difference between cells	Girls show a strongly increased startle response in the context of anxiety sweat when compared to sport sweat (t(9) = 3.211, p = 0.006 (analysis reported first = primary), d = 1.02, Power = 0.907) as well as pure cotton pad (t(9) = 1.851, p = 0.049 (analysis reported second = secondary), d = 0.47, Power = 0.416, see Fig. 1)	t(9) = 3.211, p = .006	t(9) = 1.851, p = .049
Wudarczyk et al. (2016)	1. We predicted modulatory effects of anxiety cues on the activity in regions associated with processing of emotional information from facial expressions; in particular, the amygdala, fusiform gyrus, insula and superior temporal gyrus, due to enhanced emotional context as well as multimodal integration. Moreover, consistent with the notion that olfactory “alarm” signals prepare the organism to ta…	within-subjects design, 2 (odor: anxiety sweat vs. sport sweat)	Interaction	1. The association between BOLD response and increased facial fearfulness in the contrast Anxiety>Sports showed significant activation clusters in the ... left middle occipital gyrus extending into fusiform gyrus (peak MNI coordinate: -36/-80/-2) and the left insula extending into caudate (peak MNI coordinate: -24/28/14, see figure 4a and table 3). Middle Occipital Gyrus extending to Fusiform Gyr…	t(19) = 5.0229, p < .001	t(19) = 5.3612, p < .001	F(4.7,103.46) = 4.187, p = .002, two-tailed
Hatcher (2016), dissertation	This study seeks to extend these findings by exploring the emotional effects of apocrine sweat when emotions are already likely to be in play. Because emotional contagion often results in the creation of convergent emotions in others (Hatfield, Cacioppo, & Rapson, 1994), chemically induced emotional contagion should have similar effects. Thus: H1: Those exposed to fear chemosignals will rate a fe…	within-subjects design, 2 (odor: fear sweat vs. neutral/eccrine/thermoregulatory sweat)	Simple difference between cells	1. The first analysis used a 5-item self-reported psychological fear measure (α=0.90) as the dependent variable. The original instrument contained additional items assessing other emotional responses (guilt, joy, pride, etc.), but as these emotions were not included in my hypotheses, they were excluded from this analysis. A two-sample difference of means test revealed a significant difference bet…	t(154)=6.343, p<0.0001	t(147)=3.27, p=0.0007
Wudarczyk et al. (2015)	the current study assessed the neuronal implications of exposure to chemosensory anxiety cues in a threatening context of social exclusion. Does the smell of another’s person anxiety make us more vulnerable to social exclusion or more prepared to cope with the difficult situation? Increased activity in regions typically involved in processing of social exclusion, including anterior cingulate cort…	within-subjects design, 2 (odor: fear sweat vs. sport sweat)	Interaction	Four VOIs were selected due to their contextual importance to underlying processes (see methods section for further information) in order to disentangle the smell × ostracism interaction. 1. In the VOI encompassing the superior orbitofrontal cortex and the anterior cingulate … a significant smell × condition interaction (F (1,21)= 10.664, p = 0.004) revealed that … (analysis reported first) A sig…	F(1,21) = 10.664, p = .004	F(1,21) = 6.045, p = .023
de Groot et al. (2015, PS)	Exposure to sweat obtained from happy individuals was expected to elicit a Duchenne smile, positive mood, and global processing style, whereas exposure to sweat obtained from fearful individuals was expected to induce a fearful facial expression, negative mood, and more local processing style. (for this meta-analysis, fear was taken as the independent variable of interest. EMG was taken as primar…	within-subjects design, 3 (odor: fear sweat, happy sweat, neutral sweat)	Simple difference between cells	1. EMG data Table 2. Results for Receivers: Discriminant Analysis Comparison and method Leave-one-out cross-validation Fear vs. neutral stimuli Baseline corrected 16/35 .006 (reported first) Baseline uncorrected 12/35 .14 Happiness vs. fear stimuli 2. Baseline corrected 21/35 < .001 (reported second) Baseline uncorrected 19/35 < .001 (the p-values associated with the baseline corrected measure we…	chi2(1) = 8.0095, p = .005	chi2(1) = 22.8667, p < .001	F(1,64) = 5.54, p < .001
de Groot et al. (2015, PLOS)	Receivers were expected to display signs of a simulacrum of the state of the sender only when they were exposed to sweat obtained from participants in the fast stress condition.Specifically, a simulacrum of fear was determined by (i) measuring the emergence of a fearful facial expression (i.e., increased medial frontalis and corrugator supercilii activity; cf. [3, 11, 12]) and explored further by…	within-subjects design, 3 (odor: fast stress sweat, slow stress sweat, neutral sweat)	Interaction	1. (reported first) Corrugator: As predicted, the main effects were qualified by an interaction between odor and time, F(8,240) = 3.27, p = .013. (Green-house-Geisser correction of degrees of freedom was applied, correct df: F(4.121,123.624) = 3.27) 2. (reported second) Medial Frontalis: These effects were qualified by an interaction between odor and time, F(8,240) = 2.46, p = .040. (Greenhouse-G…	F(4.121,123.624) = 3.27, p = .013	F(4.609,138.277) = 2.46, p = .04
de Groot et al. (2014, JEP:G gender)	We predicted that—compared with men—women would show a partial (behavioral and affective) reproduction of fear after being exposed to fear chemosignals relative to the neutral condition, evidenced by medial frontalis and corrugator supercilii activity. (hence, for women-not for men-a main effect of odor was expected)	Mixed design 2 (gender receiver: male, female) x 2 (odor: fear sweat, neutral sweat)	Simple difference between cells	More important, female receivers showed significantly stronger facial muscle activity following exposure to fear sweat, medial frontalis,1. F(1, 25) 9.08, p = .006; corrugator supercilii, 2. F(1, 25) 6.36, p = .018). Men did not show emotion differentiation in their facial muscle response to fear and neutral sweat, medial frontalis, F < 1; corrugator supercilii, F(1, 25) = 4.79, p = .038 (reverse…	F(1, 25) = 9.08, p = .006	F(1, 25) = 6.36, p = .018
de Groot et al. (2014, JEP:G, modalities)	We predict that both fear chemosignals and audio-visual threat signals follow the typical properties of multiple redundant signals in the sense that a fear message from each of the modalities should elicit fear contagion independently from the other. … That is, fear is adaptively more significant in whichever modality it is processed.	Within-subjects design 2 (odor: fear sweat, neutral sweat)	Simple difference between cells	The current results indeed constituted a replication (medial frontalis) and extension (corrugator supercilii) of earlier work, as only during exposure to fear sweat, medial frontalis (F(1,29) = 2.67, p < .001, ηp2 = .08) and corrugator supercilii activity (F(1,29) = 2.29, p < .001, ηp2 = .07) increased as a function of time (Figure 2). (In the paper, the degrees of freedom of the main effect, not…	F(24,696) = 2.67, p < .001	F(24,696) = 2.29, p < .001
Dalton, Wilson, Maute, & Jaen (2013, PLOS)	Chemosensory signals of stress have the potential to communicate social impressions of an individual which may be translated into poorer judgments of their competence and warmth. The goal of the current study was to evaluate how stress odors collected from donors would impact social judgments of women depicted in videos relative to body odors collected from those same donors during exercise. We a…	within-subjects desgin 3 levels (odor: stress sweat, blocked stress sweat, sport sweat)	Simple difference between cells	1. We first conducted an ANOVA on the ratings of Competence, Confidence and Trustworthiness for the women in the videos as a function of odor condition and this revealed a main effect of condition, F (2, 236) = 4.74, p= 0.009. Women in the videos who were evaluated in the presence of untreated stress sweat were consistently rated the lowest on these dimensions (t-statistics were not reported for …	F(2,236)= 4.74, p = .009		F(2,236) = 9.83, p < .001
Adolph et al. (2013), Experiment 1	We hypothesized that participants would show enhanced processing of faces in the context of chemosensory anxiety signals by showing larger startle amplitudes, enhanced early and late brain potentials, as well as less effective emotion regulation. We also predicted, that this effect would be most pronounced in socially anxious individuals.	Mixed design, 2 (b-s: high socially anxious, low socially anxious) x 2 (odor: anxiety sweat, sport sweat)	Interaction	Exp 1: 1. HSA individuals showed larger startle magnitudes toward the faces presented in the context of chemosensory anxiety cues than the LSA participants, especially toward startles presented at probe position C, F(2, 76) = 3.36, p = 0.040, f = 0.30 [Interaction Context by Time by Group. 3. Independent of the emotion regulation strategy, the participants felt more negative when the faces were p…	F(2,76) = 3.36, p = .040		F(1,38) = 8.07, p = .007
Adolph et al. (2013), Experiment 2	In Experiment II EEG was recorded and the impact of the chemosensory context stimuli (anxiety, sport control, pure cotton pad) was evaluated on early automatic structural encoding of (N1/P1, N170) and late motivational (LPP) attention allocation toward the stimuli.	Mixed design, 2 (b-s: high socially anxious, low socially anxious) x 3 (odor: anxiety sweat, sport sweat unused pads)	Simple difference between cells	Exp2: 1. Early LPP: Above central electrodes, the N1 appeared with larger amplitudes in response to faces presented in the context of chemosensory anxiety signals, t(35) = 2.71, p = 0.010, and sport stimuli, t(35) = 1.99, p = 0.054 as compared to faces presented in the context of control stimuli (Figure 3) [interaction Sagittal by Context, F(4, 136) = 2.99, p = 0.041, f = 0.30, nested effects, co…	t(35) = 2.71, p = .010	t(35) = 2.33, p = .026	t(35) = 2.19, p = .035
Radulescu & Mujica-Parodi (2013)	The original analysis [22] focused on the more general identification of an amygdala response in reaction to alarm chemosignals, irrespective of gender. Here, we complement this first study by investigating (1) whether the amygdala response exhibited any gender differences (with respect to both donors and detectors), and (2) whether these differences originated at the perceptual or emotional leve…			(only p-values were reported - there were no Z or t-statistics - these data have therefore not been subjected to p-curve analysis
de Groot et al. 2012	Hence, chemosignals were expected to cause a receiver’s facial expression to correspond with the emotional expression of the sender, and also to instigate the adaptive function of such an expression, which modulates perceptual, affective, and behavioral processes. This general hypothesis was tested in a double-blind experiment using a within-subjects design. We expected that emotional contagion t…	within-subjects desgin 3 levels (odor: fear sweat, disgust sweat, unused pads)	two-way interaction	1. An increase in medial frontalis activity (Fig. 1a) from baseline reflected the distinctive facialmuscle signature of fear that was activated—Epoch 1: F(4, 108) = 8.76, p < .001, η2 = .02 ... after fear chemosignal exposure. (primary analysis reported first) 2. Moreover, fear chemosignals generated an expression of fear and not disgust, F(4, 108) = 3.82, p = .006, η2 = .01, (primary analysis re…	F(4,108) = 8.76, p < .001,	F(4, 108) = 3.82, p = .006	F(18,540)=3.24, p < .001
Rubin.. Mujica-Parodi (2012)	We hypothesized that stress sweat might generalize threat appraisal from angry faces (i.e. overt threat) to ambiguous and neutral faces (i.e. potential threat) and that the increased salience of neutral and ambiguous faces under stress sweat conditions would be reflected in an increased LPP. (here, it seems like an overall increased salience is predicted - therefore, a main effect was selected fo…	within-subjects design 2 levels (odor: fear sweat vs. sport sweat)	Simple difference between cells	Compared to exercise, the stress condition was associated with increased LPPs overall [early portions of the LPP: F(1, 13) = 8.02, P = 0.014; late portion of the LPP: F(1, 13) = 5.38, P = 0.037; Figure 1A]. (analysis mentioned first is entered under 5, whereas the result mentioned second is entered under 6) Selecting the interaction facial expression x odor would not change the outcome of the ana…	F(1,13) = 8.02, p = .014	F(1,13) = 5.38, p = .037
Zernecke et al. (2011)	In the present study we examined whether anxiety chemosignals affect participants’ perception of ambiguous happy male faces.	within-subjects design 2 levels (odor: fear sweat vs. sport sweat)	Simple difference between cells	Participants rated the facial expressions under exposure of anxiety sweat (M = 29.20, SD = 17.08) as significantly less happy compared to the ratings made under exercise (M = 27.28, SD = 16.91; Friedman test, p = .003; Wilcoxon signed-rank test, p = .004) and control samples (M = 28.35, SD = 17.91; Wilcoxon signed-rank test, p = .048). (Simple main effects were subjected to p-curve analysis. The …	Z = 2.85*, p = .004	Z = 1.98*, p = .048
Albrecht et al. (2011)	Therefore the hypothesis of this study was that sweat originating from the anxiety condition compared with the nonanxiety condition increases subjective perception of anxiety in odor recipients. This one-tailed hypothesis was tested using the established method of the Spielberger’s state-trait anxiety inventory (STAI) in a double-blind design.	within-subjects design 2 levels (odor: fear sweat vs. sport sweat)	Simple difference between cells	1. However, the recipients’ state anxiety differed significantly between neutral (mean 32.8, SD 7.7) and anxiety condition (mean 36.3, SD 9.3) after 20 min of odor exposure (t1,19 = 1.9, P = 0.035, one-tailed Wilcoxon signed ranks test) (Figure 2). (usually a z-value is reported for a Wilcoxon-signed ranks test. The p-value was taken from this statistic, but it was accompanied by a Z-value that w…	Z = 2.11*, p = .035
Haegler et al. (2010)	In the present study we explored if anxiety-related chemosignals derived from a visit in a high-rope course change the willingness to take a risk using a novel decision-making task, called Haegler’s Risk Game (HRG).	within-subjects design 3 levels (odor: fear sweat vs. sport sweat, unused pads)	Simple difference between cells	1. Whereas, the parameter indicating most risky behavior (2-lower and 9-higher) was significantly higher in the anxiety compared to the control (Friedman test, p = 0.020; Wilcoxon signed rank test, p = 0.039) as well as the exercise (Wilcoxon signed rank test, p = 0.005) condition. (the analysis reported first was used under (5), whereas the analysis reported second was used under (6 - robustness…	Z = 2.06*, p = .039	Z =2.78*, p = .005	Z =2.34*, p = .019
Pause et al. (2010), Exp 1	The aim of the first experiment was to investigate in a highly time-sensitive manner (analyzing chemosensory event-related potentials; CSERPs) whether and how chemosensory anxiety signals are processed by the brain. In the second experiment nonclinical highly socially anxious participants were investigated. In order to increase the statistical power of this first time-sensitive investigation of n…	within-subjects design 2 levels (odor: fear sweat vs. sport sweat)	Simple difference between cells	In female participants the P3 peak appeared with a larger amplitude in response to chemosensory anxiety stimuli as compared to chemosensory control stimuli [Fig. 1a; Chemosensory Condition by Sex of Perceiver: F (1, 26) =6.30, p = 0.019, f (Cohen’s f) = 0.49, Power = 0.67; nested effects: Chemosensory condition in female participants: F(1, 26) = 5.29, p = 0.030, f =0.45, Power = 0.60]. (since gen…	F(1,26) = 6.30, p = .019	F(1,26) = 5.29, p = .03
Pause et al. (2010), Exp 2	Same as above (exp 1). Participants, here, were socially anxious individuals.	within-subjects design 2 levels (odor: fear sweat vs. sport sweat)	Simple difference between cells	The amplitude of the N1 component in socially anxious female participants was larger in response to chemosensory stimuli donated during the anxiety condition than in response to chemosensory stimuli donated in the sport control condition above posterior scalp regions [Chemosensory Condition by Sex of Perceiver by Sagittal: F (2, 28) = 5.93, p =0.009, f= 0.74, Power = 0.84; nested effects: Chemose…	F(2,28) = 5.93, p = .009	F(1,15) = 5.49, p = .033
Zhou & Chen (2009), Experiment 1	Given that the influence of one emotionalmodality has the greatest effect on the other when the latter is ambiguous (de Gelder & Vroomen, 2000; Massaro & Egan, 1996), it is natural to predict that if chemosensory modulation of visual emotion perception occurs, it will be strongest when the visual emotional cues are most ambiguous.	within-subjects design 3 levels (odor: fear sweat vs. happy sweat, unused pads)	Interaction	Nevertheless, olfactory input affected identifications when the visual cues became most ambiguous; olfactory condition had a significant effect at Level 4, F(2, 94) = 3.17, p =.047, ... but not at the other levels (ps>.50). Post hoc analysis showed that at Level 4 (see Fig. 2b), subjects were more likely to judge a face to be fearful when they were exposed to the fearful sweat, as compared with t…	F(2,94) = 3.17, p = .047
Zhou & Chen (2009), Experiment 2	Same as above (exp 1)	within-subjects design 2 levels (odor: fear sweat vs. unused pads)	Difference of means	Subjects were more likely to judge a face at the most ambiguous level (4) to be fearful when they were exposed to the chemosignal of fearful sweat, as compared with the control pad, t(15) =3.27, p =.005, Cohen’s d = 0.74 (see Fig. 3). For each of the other levels, the difference between conditions was not significant (ps>.18).	t(15) = 3.27, p = .005
Mujica-Parodi et al. (2009), Exp1	Two fMRI experiments assessed amygdala activation as well as possible gender interactions that could indicate confounds due to reproductive chemosignals, which have been shown to be sex-specific. we tested the behavioral implications of the amygdala activation, to investigate how stress sweat affects threatperception using psychometric curves generated by participants’ responses to morphed neutra…	within-subjects design 2 levels (odor: stress sweat vs. sport sweat)	Difference of means	Because we hypothesized that perception of emotional stress would modulate activity in a brain area related to emotion, our analyses focused on the amygdala; all values were corrected for multiple-comparisons using small-volume correction (SVC). For both experiments, these revealed significant activation of the left amygdala (Original Experiment: t=4.80/Z=3.68, p(svc)=0.02 [MNI x, y, z=216, 210, …	Z =3.68, p < .001	Z = 2.32, p = .02
Mujica-Parodi et al. (2009), Exp2	See above	within-subjects design 2 levels (odor: stress sweat vs. sport sweat)	Difference of means	Because we hypothesized that perception of emotional stress would modulate activity in a brain area related to emotion, our analyses focused on the amygdala; all values were corrected for multiple-comparisons using small-volume correction (SVC). For both experiments, these revealed significant activation of the left amygdala (Original Experiment: t=4.80/Z=3.68, p(svc)=0.02 [MNI x, y, z=216, 210, …	Z=3.88, p < .001
Mujica-Parodi et al. (2009), Exp3	See above	within-subjects design 2 levels (odor: stress sweat vs. sport sweat)	Difference of means	These showed sharpened discrimination (mean 43% increase) between neutral versus angry faces in response to the stress sweat (Stress: s= 0.192, s.d. =0.101; Exercise: s= 0.134, s.d.= 0.066; repeated-measures ANOVA: F =8.30, p= 0.01, N= 14, Figure 5b).	F(1,13) = 8.30, p = .013
Prehn-Kristensen et al. (2009)	The present study aimed to investigate the neuronal correlates of the chemosensory perception of anxiety.	within-subjects design 2 levels (odor: stress sweat vs. sport sweat)	Difference of means	Contrasting the perception of anxiety sweat with sport sweat, significant brain activations were detected in the right insula (BA 44, 47, 48; Fig. 3a), the right precuneus (BA 4, 5; Fig. 3b), the left supramarginal gyrus (BA 40), the right thalamus, the dorsomedial frontal gyrus (BA 6, 8, 9), the right inferior frontal gyurs (BA 44), the right anterior (BA 24) and posterior (BA 23, 29) cingulated…	Z = 4.62, p < .001	Z = 3.39, p < .001
Pause et al. (2009)	It was the aim of the present study to validate the effect of chemosensory anxiety signals on the startle reflex. As socially anxious individuals demonstrate preferential processing of social threat (Bar- Haim et al., 2007; Hirsch and Clark, 2004), in the present study a group of non-clinical socially anxious participants was compared to non-anxious control participants.	within-subjects design 2 levels (odor: stress sweat vs. sport sweat)	Difference of means	1. Startle responses were stronger in the context of the chemosensory stimuli donated in the anxiety condition than in the context of sweat donated in the sport control condition (Chemosensory Condition: F (2, 28)=7.55, p=0.002, f=0.73; single comparisons: anxiety vs. sport: t (15)=3.87, p=0.002, d=0.97; anxiety vs. cotton pad: t (15)=2.03, p=0.06, d=0.51; sport vs. cotton pad: t (15)=1.84, p=0.0…	F(2,28) = 7.55, p = .002		t(15) = 3.60, p = .003
Prehn et al. (2006)	The aim of the present study was to investigate whether chemosensory anxiety signals activate withdrawal reflexes in humans. ... Here, we compared the pre-attentive motivational adaptations in the context of chemosensory stimuli derived from sweat samples, collected either in an anxiety or in an exercise condition. We hypothesized a transmission of negative emotional states from chemosensory anxi…	within-subjects design 2 levels (odor: stress sweat vs. sport sweat)	Difference of means	However, as predicted, the startle response elicited in the context of chemosensory anxiety stimuli was larger than in the context of chemosensory exercise (dependent sample-t(6) = 2.69; p = 0.018; one-tailed; power = 0.81) or cotton pad stimuli (dependent sample-t(6) = 2.95; p = 0.012; onetailed; power = 0.85).(tests were one-tailed, but for the analyses the p-values were more conservatively tre…	t(6) = 2.69, p = .036	t(6) = 2.9549, p = .025
Chen et al. (2006)	If fear chemosignals affect global task performance, we predicted that the influence (either enhancement or impedance) would be strongest on related variables, biasing the ability to recognize relationships, including ambiguous ones, and affecting both threat and nonthreat words. Research on olfactory priming suggests that olfactory stimuli facilitate the detection of pictures or generation of wo…	between-subjects design 3 levels (odor: fear sweat vs. neutral sweat vs. unused pads)	Difference of means	When combined across word relatedness, olfactory condition was the biggest between-subjects factor for those who identified the word pairs correctly, F(2,47) = 3.47, Eta2 = 0.13, P = 0.039. When combined across word relatedness, olfactory condition was the biggest between-subjects factor for those who identified the word pairs correctly, F(2,47) = 3.57, Eta2 = 0.13, P = 0.036. (the p-value report…	F(2,47) = 3.47, p = .039	F(2,47) = 3.57, p = .036
Pause et al. (2004)	an effect of the chemosensory stimuli on these judgements would demonstrate that chemosensory anxiety signals are implicitly processed as important biological signals. We hypothesized that such signals should affect subliminal face perception, either by strengthening the perception of fearful faces or, more generally, of negative facial expressions, or by weakening the perception of happy faces. …	within-subjects design 2 levels (odor: stress sweat vs. sport sweat)	Difference of means	In the context of chemosensory signals of samples taken during a state of high anxiety, females judged targets primed with happy faces significantly less positive than in the control (sport) condition [t(7) = 3.74, P (α, corr.) = 0.02, power (related to an α-error of 5%) = 0.95; see Table 2]. However, the chemosensory stimuli from the anxiety sweat did not change the negative judgements of target…	t(7) = 3.74, p = .021
Ackerl et al. (2002)	If other mammals are able to warn their conspecifics – or at least send out the information that they are in a frightening situation – by emitting odourous substances, the question becomes prominent: Do humans possess similar mechanisms? If so, how are these Kerstin Ackerl, Michaela Atzmueller & Karl Grammer mechanisms related to cortisol release? The current research aims to address these questi…	within-subjects design 2 levels (odor: stress sweat vs. neutral sweat)	Difference of means	1. In order to fi nd out if women were able to detect a difference between the “neutral” smell and the “frightened” smell of the pads, we used a triple forced choice test. This setting implies that a right decision by chance would happen with a probability of 33%. We found that the odour assessments were signifi cantly more often correct than it could be expected by mere chance probability (One-S…	t(40) = 3.305, p = .002		Z = 2.948, p = .003
Chen & Haviland-Jones (2000)	The present study was designed to assess whether natural human body odors may also carry emotional information about the odor donors which can be detected by others.	within-subjects design 3 levels (odor: fear sweat vs. happy sweat vs. neutral sweat)	Difference of means	When asked to pick which bottle contained "the odor of people when they are afraid," both women and men chose above chance (45% of women and 30% of men vs 17% chance) the bottle that contained the body odors collected when men (but not women) viewed the frightening movie (zs =4.50 and 1.90, respectively, p < .0001 and p = .057, 2-tailed, rs = .71 and .3 1). Neither women nor men chose the female …	z = 4.50

## Sheet: Actual p-curves
	Primary	Secondary	Tertiary		I								II							III
	t(9) = 3.211	t(9) = 1.851	t(9) = 3.211
	t(19) = 5.0229	t(19) = 5.3612	F(4.7,103.46) = 4.187
	t(154)=6.343	t(147)=3.27	t(154)=6.343
	F(1,21) = 10.664	F(1,21) = 6.045	F(1,21) = 10.664
	chi2(1) = 8.0095	chi2(1) = 22.8667	F(1,64) = 5.54
	F(4.121,123.624) = 3.27	F(4.609,138.277) = 2.46	F(4.121,123.624) = 3.27
	F(1, 25) = 9.08	F(1, 25) = 6.36	F(1, 25) = 9.08
	F(24,696) = 2.67	F(24,696) = 2.29	F(24,696) = 2.67
	F(2,236)= 4.74	F(2,236)= 4.74	F(2,236) = 9.83
	F(2,76) = 3.36	F(2,76) = 3.36	F(1,38) = 8.07
	t(35) = 2.71	t(35) = 2.33	t(35) = 2.19
	F(4,108) = 8.76	F(4, 108) = 3.82	F(18,540)=3.24
	F(1,13) = 8.02	F(1,13) = 5.38	F(1,13) = 8.02
	Z = 2.85	Z = 1.98	Z = 2.85
	Z = 2.11	Z = 2.11	Z = 2.11
	Z = 2.06	Z =2.78	Z =2.34
	F(1,26) = 6.30	F(1,26) = 5.29	F(1,26) = 6.30
	F(2,28) = 5.93	F(1,15) = 5.49	F(2,28) = 5.93
	F(2,94) = 3.17	F(2,94) = 3.17	F(2,94) = 3.17
	t(15) = 3.27	t(15) = 3.27	t(15) = 3.27
	Z =3.68	Z = 2.32	Z =3.68
	Z=3.88	Z=3.88	Z=3.88
	F(1,13) = 8.30	F(1,13) = 8.30	F(1,13) = 8.30
	Z=4.62	Z = 3.39	Z=4.62
	F(2,28) = 7.55	F(2,28) = 7.55	t(15) = 3.60
	t(6) = 2.69	t(6) = 2.9549	t(6) = 2.69
	F(2,47) = 3.47	F(2,47) = 3.57	F(2,47) = 3.47
	t(7) = 3.74	t(7) = 3.74	t(7) = 3.74
	t(40) = 3.305	t(40) = 3.305	Z = 2.948
	z = 4.50	z = 4.50	z = 4.50
